# Supplementary material for: Genetic disruption of the oncogenic HMGA2–PLAG1–IGF2 pathway causes fetal growth restriction
Source: PubMed Central journal article supplement — Genet Med. 2017 Aug 10;20(2):250–8. doi: 10.1038/gim.2017.105 (PMC5846811; doi:10.1038/gim.2017.105), 2017-08-10
Supplement: gim2017105x1.pdf [file gim2017105x1.pdf]

## Supplementary Tables

| Chrom | Position  | Gene    | Refseq       | Protein variant | Type of variant | Genotype |
|-------|-----------|---------|--------------|-----------------|-----------------|----------|
| chr1  | 6195297   | CHD5    | NM_015557    | M955V           | missense        | C/T      |
| chr1  | 145560247 | ANKRD35 | NM_144698    | R245W           | missense        | C/T      |
| chr1  | 222717489 | HHIPL2  | NM_024746    | T122A           | missense        | C/T      |
| chr5  | 137589524 | GFRA3   | NM_001496    | R319*           | nonsense        | A/G      |
| chr8  | 48508474  | SPIDR   | NM_001080394 | V400A           | missense        | C/T      |
| chr8  | 90983508  | NBN     | NM_002485    | P199S           | missense        | A/G      |
| chr9  | 114338650 | ZNF483  | NM_001007169 | H243Y           | missense        | C/T      |
| chr11 | 85445332  | SYTL2   | NM_032943    | G346E           | missense        | C/T      |
| chr11 | 125851006 | CDON    | NM_001243597 | G1072R          | missense        | C/T      |
| chr12 | 122406044 | WDR66   | NM_144668    | R914C           | missense        | C/T      |
| chr16 | 19873179  | GPRC5B  | NM_016235    | V383I           | missense        | C/T      |
| chr16 | 48121966  | ABCC12  | NM_033226    | R1169H          | missense        | C/T      |
| chr16 | 83781822  | CDH13   | NM_001220488 | V597M           | missense        | A/G      |
| chr17 | 7591983   | WRAP53  | NM_018081    |                 | exon            | CT/-     |
| chr17 | 40269120  | KAT2A   | NM_021078    | R566H           | missense        | C/T      |
| chr19 | 48385433  | SULT2A1 | NM_003167    | L127S           | missense        | A/G      |
| chr22 | 37603284  | SSTR3   | NM_001278687 | G187R           | missense        | C/G      |
| chrX  | 114425490 | RBMXL3  | NM_001145346 | D496N           | missense        | A/G      |

Supplementary Table 1: These 18 other variants found in the affected members of the family have no known effect on growth. These variants were not validated by Sanger sequencing.

|              |                        |
|--------------|------------------------|
| GAPDH-F      | GAAGGTGAAGGTCGGAGTCAAC |
| GAPDH-R      | CAGAGTTAAAAGCAGCCCTGGT |
| total-IGF2-F | TGGACACCCTCCAGTTCGTC   |
| total-IGF2-R | GCGGAAACAGCACTCCTCAA   |
| IGF2-P3-F    | GTCCCCACAGACGAACTGGA   |
| IGF2-P3-R    | TTCGGTTTGCGACACGCAG    |
| IGF2-P1-F    | CTGCTGGAGCTGAGCCTCAG   |
| IGF2-P1-R    | TGAGCTGGCAGCGATTCAG    |
| H19-F        | GGTGGCCATGAAGATGGAGT   |
| H19-R        | GTGTGACGGCGAGGACAG     |

Supplementary Table 2: Sequence of the RT-qPCR primers used in this study.

# Supplementary Figure

## PLAG1 mutations

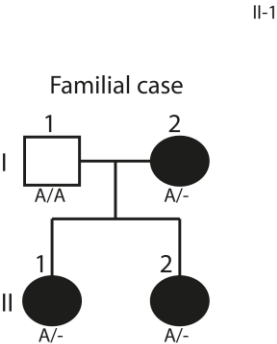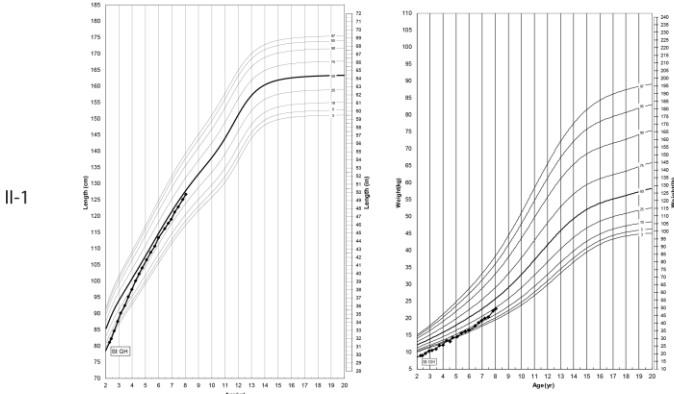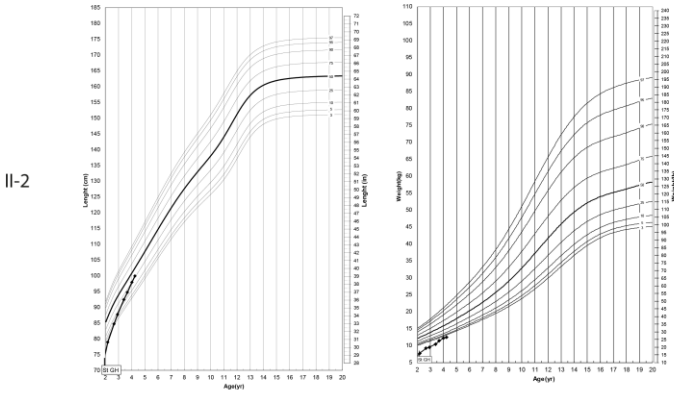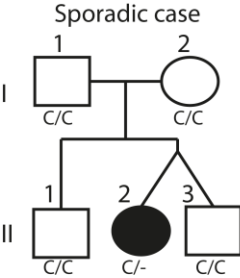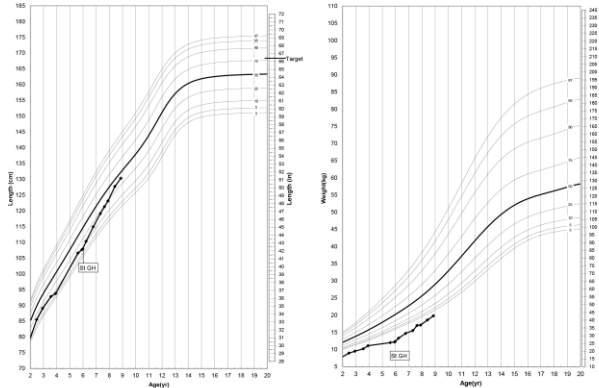

## IGF2 mutation NM\_000612.5:c.78C>G

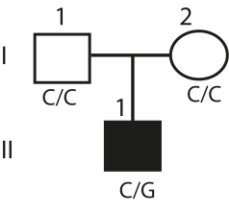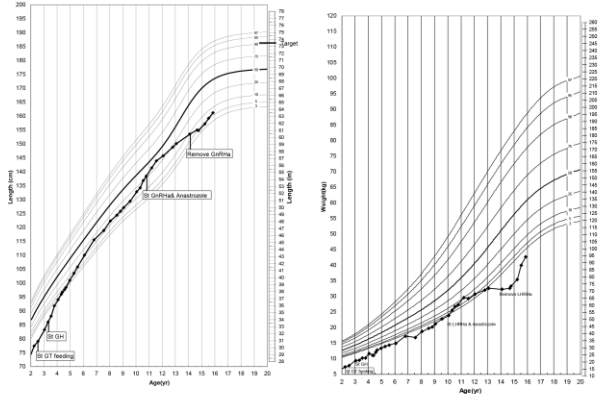

Pedigrees, growth charts (2 to 20 years of age) of patients with SRS carrying mutations of the *PLAG1* and *IGF2* genes.
